# Supplementary material
Source: Springer Nature journal article supplement (https://www.springermedizin.de/resource/supplementary/12998_2009_128_MOESM1_ESM.pdf/9623620)

A.

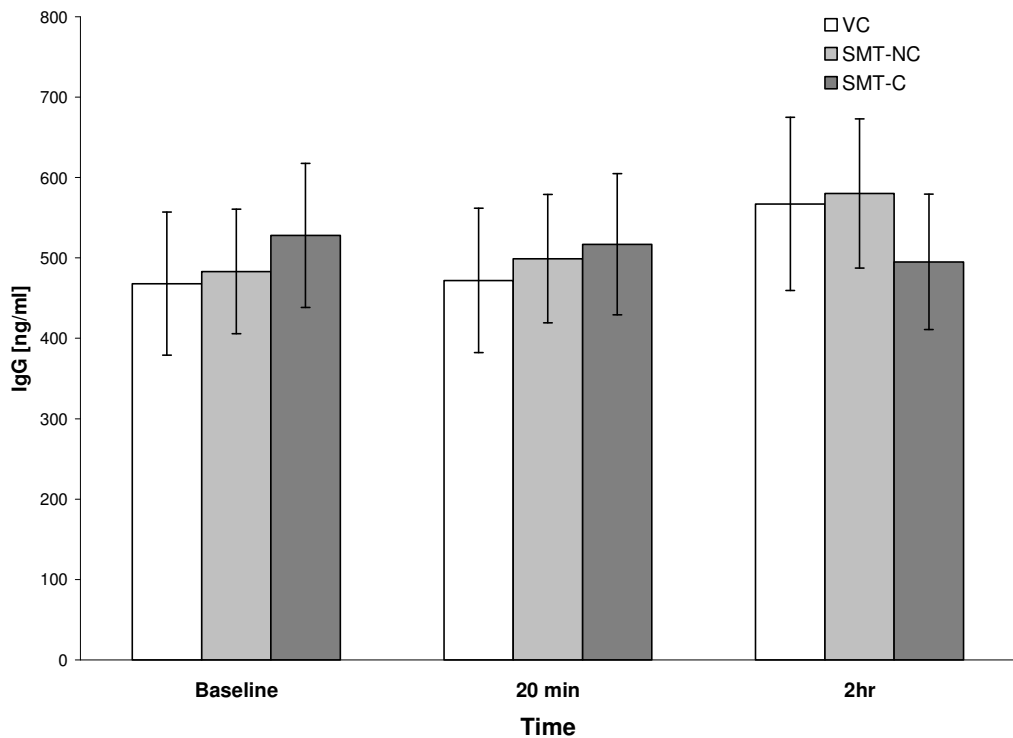

B.

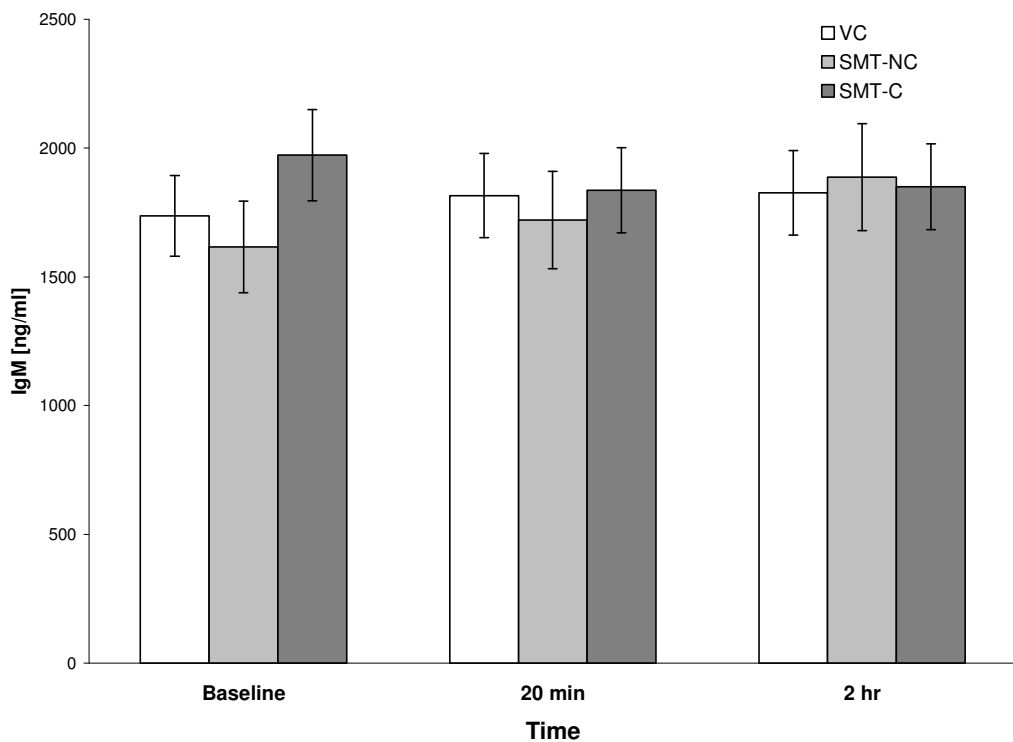

Supplement: MOESM1 [file 9623620]
